# Supplementary material
Source: PubMed Central journal article supplement (PMC7642083)
Supplement: AEM.01758-20-s0001.pdf [file AEM.01758-20-s0001.pdf]

**Supplemental. NfoR, Chromate Reductase or FMN reductase ?**

Audrey G. O'Neill, Brett A. Beaupre, Yuanzhang Zheng, Dali Liu and Graham R. Moran<sup>†</sup>  
Department of Chemistry and Biochemistry, 1068 W Sheridan Rd, Loyola University Chicago,  
Chicago, IL 60660.

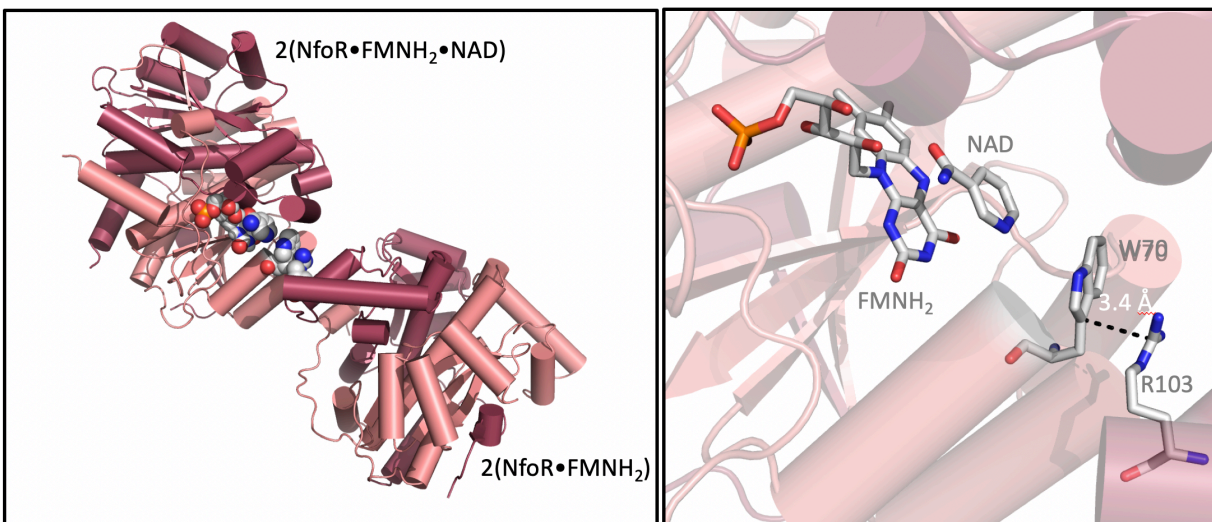

**Figure S1.** Binding of the Nicotinamide Ring of NAD<sup>+</sup> is a crystal soaking artifact The nicotinamide is stabilized by close  $\pi$ - $\pi$ / $\pi$ -cation stacking of W70 and R103 across the crystallographic contact.
